# Supplementary material
Source: PubMed Central journal article supplement (PMC4755484)
Supplement: NIHMS753889-supplement-Supplement.pdf [file NIHMS753889-supplement-Supplement.pdf]

## Supplemental Information

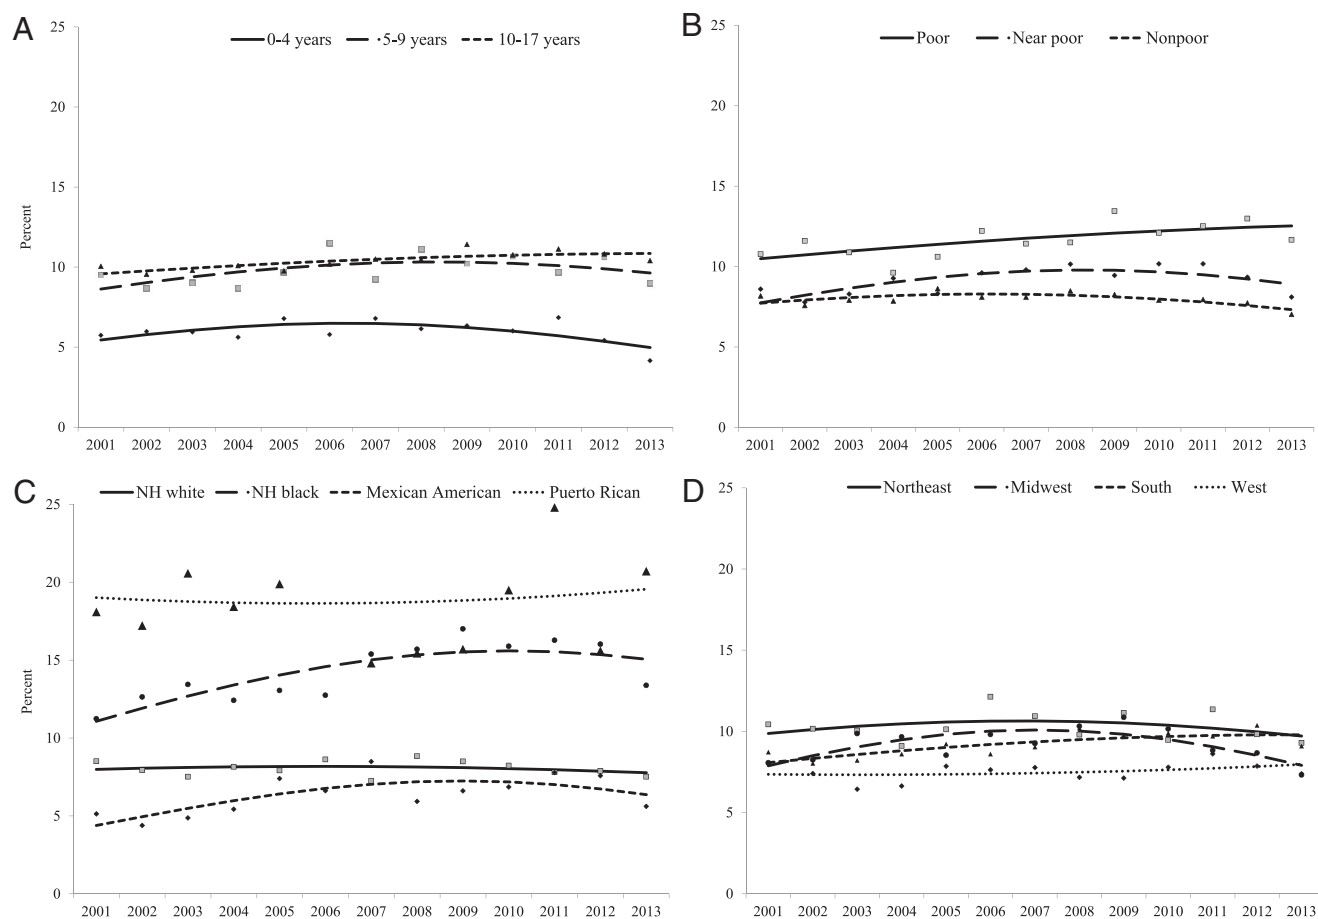

### SUPPLEMENTAL FIGURE 4

Unadjusted predicted margins of current asthma prevalence among 0- to 17-year-olds by age group (A), poverty status (B), race/ethnicity (C), and geographic region (D): 2001–2013. Symbols represent annual current asthma prevalence estimates. Lines represent predicted margins of current asthma prevalence from unadjusted models. Source: CDC/NCHS, NHIS. NH, non-Hispanic.

**SUPPLEMENTAL TABLE 1** Trends for Current Asthma Prevalence Among Children 0 to 17 Years of Age: United States, 2001–2013

|                   | Shape of Trend           |
|-------------------|--------------------------|
| Age group         |                          |
| 0–4 years         | Quadratic (F = 9.29)**   |
| 5–9 years         | Quadratic (F = 3.93)*    |
| 10–17 years       | Linear (F = 10.53)**     |
| Poverty status    |                          |
| Poor              | Linear (F = 5.60)*       |
| Near poor         | Quadratic (F = 7.36)**   |
| Nonpoor           | Quadratic (F = 11.50)*** |
| Race/ethnicity    |                          |
| NH white          | No significant trend     |
| NH black          | Quadratic (F = 8.15)**   |
| Puerto Rican      | No significant trend     |
| Mexican American  | Quadratic (F = 18.57)*** |
| Geographic region |                          |
| Northeast         | No significant trend     |
| Midwest           | Quadratic (F = 15.16)*** |
| South             | Linear (F = 6.77)**      |
| West              | No significant trend     |

Values were adjusted for age group, poverty status, race/ethnicity, geographic region, gender, family structure, and urbanicity and 4 interaction terms between time and (1) age, (2) poverty status, (3) race/ethnicity, and (4) geographic region. Significance or trend tested with orthogonal polynomial contrasts. \* $P < .05$ , \*\* $P < .01$ , \*\*\* $P < .001$ . NH, non-Hispanic.

SUPPLEMENTAL TABLE 2 Annual Linear Slopes for Modeled Trends in Current Asthma Prevalence

|                | Percentage Point Change per Year |       |       |       |       |       |       |        |        |        |        |        |        |
|----------------|----------------------------------|-------|-------|-------|-------|-------|-------|--------|--------|--------|--------|--------|--------|
|                | 2001                             | 2002  | 2003  | 2004  | 2005  | 2006  | 2007  | 2008   | 2009   | 2010   | 2011   | 2012   | 2013   |
| Age group      |                                  |       |       |       |       |       |       |        |        |        |        |        |        |
| 0-4 years      | 0.31*                            | 0.28* | 0.22* | 0.16  | 0.09  | 0.01  | -0.07 | -0.15* | -0.22* | -0.28* | -0.33* | -0.36* | -0.38* |
| 5-9 years      | 0.40*                            | 0.37* | 0.34* | 0.29* | 0.23* | 0.16* | 0.09  | 0.01   | -0.06  | -0.13  | -0.19  | -0.24  | -0.28  |
| 10-17 years    | 0.17                             | 0.18  | 0.18  | 0.18* | 0.16* | 0.14* | 0.12* | 0.10*  | 0.08   | 0.06   | 0.05   | 0.04   | 0.04   |
| Race/ethnicity |                                  |       |       |       |       |       |       |        |        |        |        |        |        |
| NH white       | 0.01                             | 0.02  | 0.02  | 0.01  | 0.01  | 0.00  | -0.01 | -0.02  | -0.02  | -0.02  | -0.01  | 0.00   | 0.03   |
| NH black       | 0.81*                            | 0.77* | 0.71* | 0.62* | 0.52* | 0.40* | 0.26* | 0.13   | 0.00   | -0.13  | -0.24  | -0.34  | -0.42  |
| NH other       | 0.42                             | 0.38  | 0.32  | 0.24  | 0.16  | 0.07  | -0.02 | -0.11  | -0.19  | -0.27  | -0.33  | -0.37  | -0.40  |
| Puerto Rican   | -0.02                            | 0.01  | 0.03  | 0.04  | 0.05  | 0.05  | 0.06  | 0.06   | 0.08   | 0.09   | 0.12   | 0.16   | 0.21   |
| Mexican        | 0.68*                            | 0.67* | 0.64* | 0.56* | 0.45* | 0.31* | 0.15* | -0.01  | -0.17  | -0.32* | -0.44* | -0.53* | -0.59* |
| Other Hispanic | 0.02                             | 0.03  | 0.03  | 0.03  | 0.03  | 0.03  | 0.02  | 0.01   | 0.02   | 0.02   | 0.03   | 0.05   | 0.08   |
| Poverty status |                                  |       |       |       |       |       |       |        |        |        |        |        |        |
| Poor           | -0.01                            | 0.04  | 0.08  | 0.11  | 0.13  | 0.15  | 0.17* | 0.19*  | 0.22*  | 0.25   | 0.29   | 0.33   | 0.40   |
| Near poor      | 0.44*                            | 0.42* | 0.38* | 0.33* | 0.26* | 0.19* | 0.11  | 0.02   | -0.06  | -0.13  | -0.20  | -0.25  | -0.30  |
| Nonpoor        | 0.29*                            | 0.26* | 0.22* | 0.18* | 0.12* | 0.06  | -0.01 | -0.08  | -0.14* | -0.19* | -0.24* | -0.28* | -0.30* |
| Region         |                                  |       |       |       |       |       |       |        |        |        |        |        |        |
| Northeast      | 0.32                             | 0.29  | 0.25  | 0.20  | 0.14  | 0.07  | 0.00  | -0.07  | -0.14  | -0.20  | -0.25  | -0.30  | -0.33  |
| Midwest        | 0.70*                            | 0.64* | 0.56* | 0.45* | 0.32* | 0.17* | 0.01  | -0.15  | -0.30* | -0.43* | -0.55* | -0.63* | -0.69* |
| South          | 0.20                             | 0.20  | 0.20* | 0.18* | 0.17* | 0.15* | 0.12* | 0.10*  | 0.07   | 0.05   | 0.03   | 0.02   | 0.01   |
| West           | -0.14                            | -0.10 | -0.06 | -0.02 | 0.01  | 0.03  | 0.05  | 0.08   | 0.10   | 0.13   | 0.16   | 0.20   | 0.25   |
